# Supplementary material for: Trisomy of human chromosome 21 enhances amyloid-β deposition independently of an extra copy of APP
Source: PubMed Central journal article supplement (PMC6061702; doi:10.1093/brain/awy159), 2018-06-26
Supplement: awy159_supplementary_data.pdf [file awy159_supplementary_data.pdf]

## Supplementary Figure 1

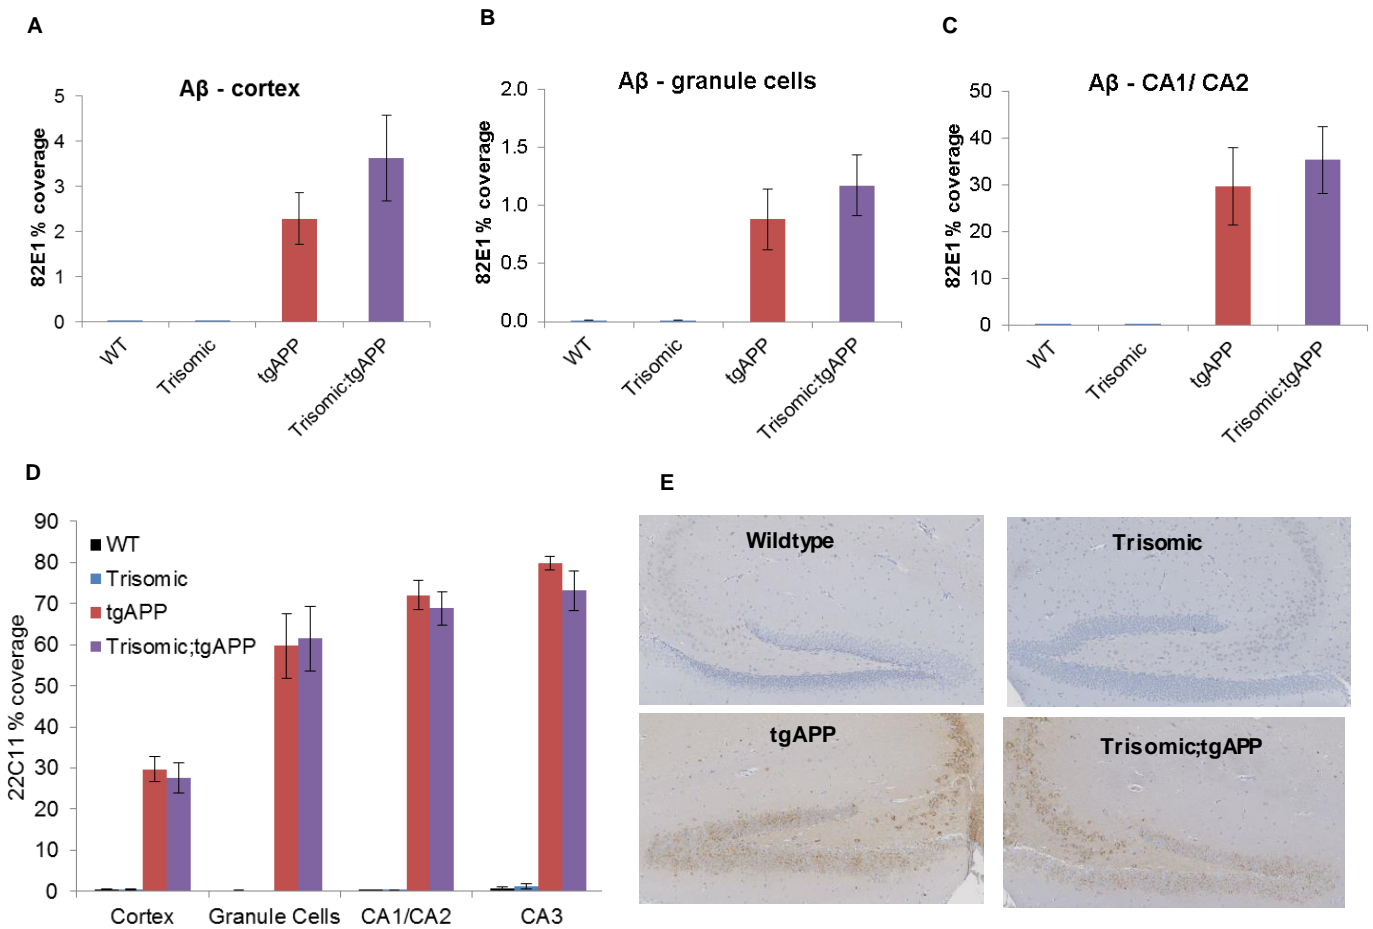

### Supplementary Fig. 1: Aβ and FL-APP staining in the hippocampus and cortex

(A-E) Aβ and APP staining in the brain of wildtype (WT), Trisomic, tgAPP and Trisomic;tgAPP mice was quantified by immunohistochemistry, using (A,B,C) anti-Aβ antibody (82E1) and (D,E) anti-APP antibody (22C11). Mice were between 4.5-6.5-months of age (mean age for groups: WT = 146 days, Trisomic = 162 days, tgAPP = 159 days, Trisomic;tgAPP = 144 days). Trisomy of chromosome 21 did not significantly alter the area covered by Aβ in (A) cortex (trisomy-tgAPP interaction  $F(1,31) = 1.267$ ,  $p = 0.269$ ), (B) the granule cells of the dentate gyrus (trisomy-tgAPP interaction  $F(1,31) = 2.781$ ,  $p = 0.105$ ), (C) or in CA1/CA2 pyramidal cells (trisomy-tgAPP interaction  $F(1,31) = 0.730$ ,  $p = 0.399$ ). (D,E) Trisomy of chromosome 21 did not significantly alter the area covered by APP staining in cortex (trisomy-tgAPP interaction  $F(1,31) = 0.053$ ,  $p = 0.819$ ), the granule cells of the dentate gyrus (trisomy-tgAPP interaction  $F(1,31) = 0.096$ ,  $p = 0.756$ ), CA1/CA2 pyramidal cells (trisomy-tgAPP interaction  $F(1,31) = 0.475$ ,  $p = 0.496$ ) or CA3 pyramidal cells (trisomy-tgAPP interaction  $F(1,31) = 2.931$ ,  $p = 0.097$ ). Data show mean  $\pm$  SEM. Both sexes were studied and sex was included as a variable in the ANOVA.

## Supplementary Figure 2

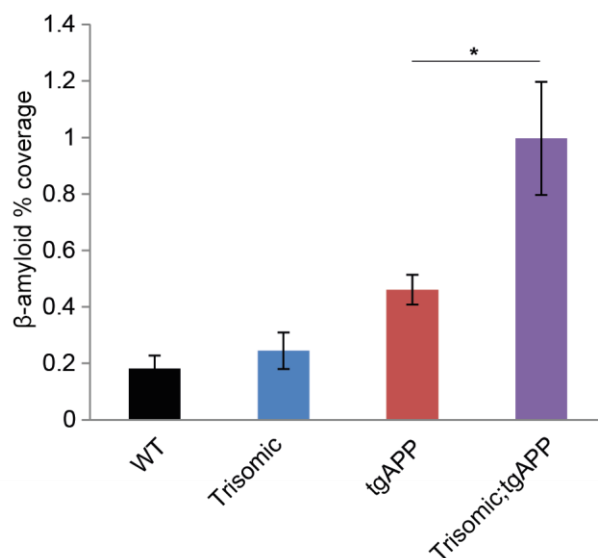

### Supplementary Fig. 2: A $\beta$ deposition in the cortex

A $\beta$  deposition in the cortex of wildtype (WT), Trisomic, tgAPP and Trisomic;tgAPP mice was quantified using anti- $\beta$ -amyloid antibody (6F/3D) at 16-months of age. Trisomy of chromosome 21 increases the area covered (ANOVA tgAPP-trisomy interaction  $F(1,37) = 5.803$ ,  $p = 0.021$ ). Data show mean  $\pm$  SEM,  $p < 0.05 = *$ . Both sexes were studied and sex was included as a variable in the ANOVA.

# Supplementary Figure 3

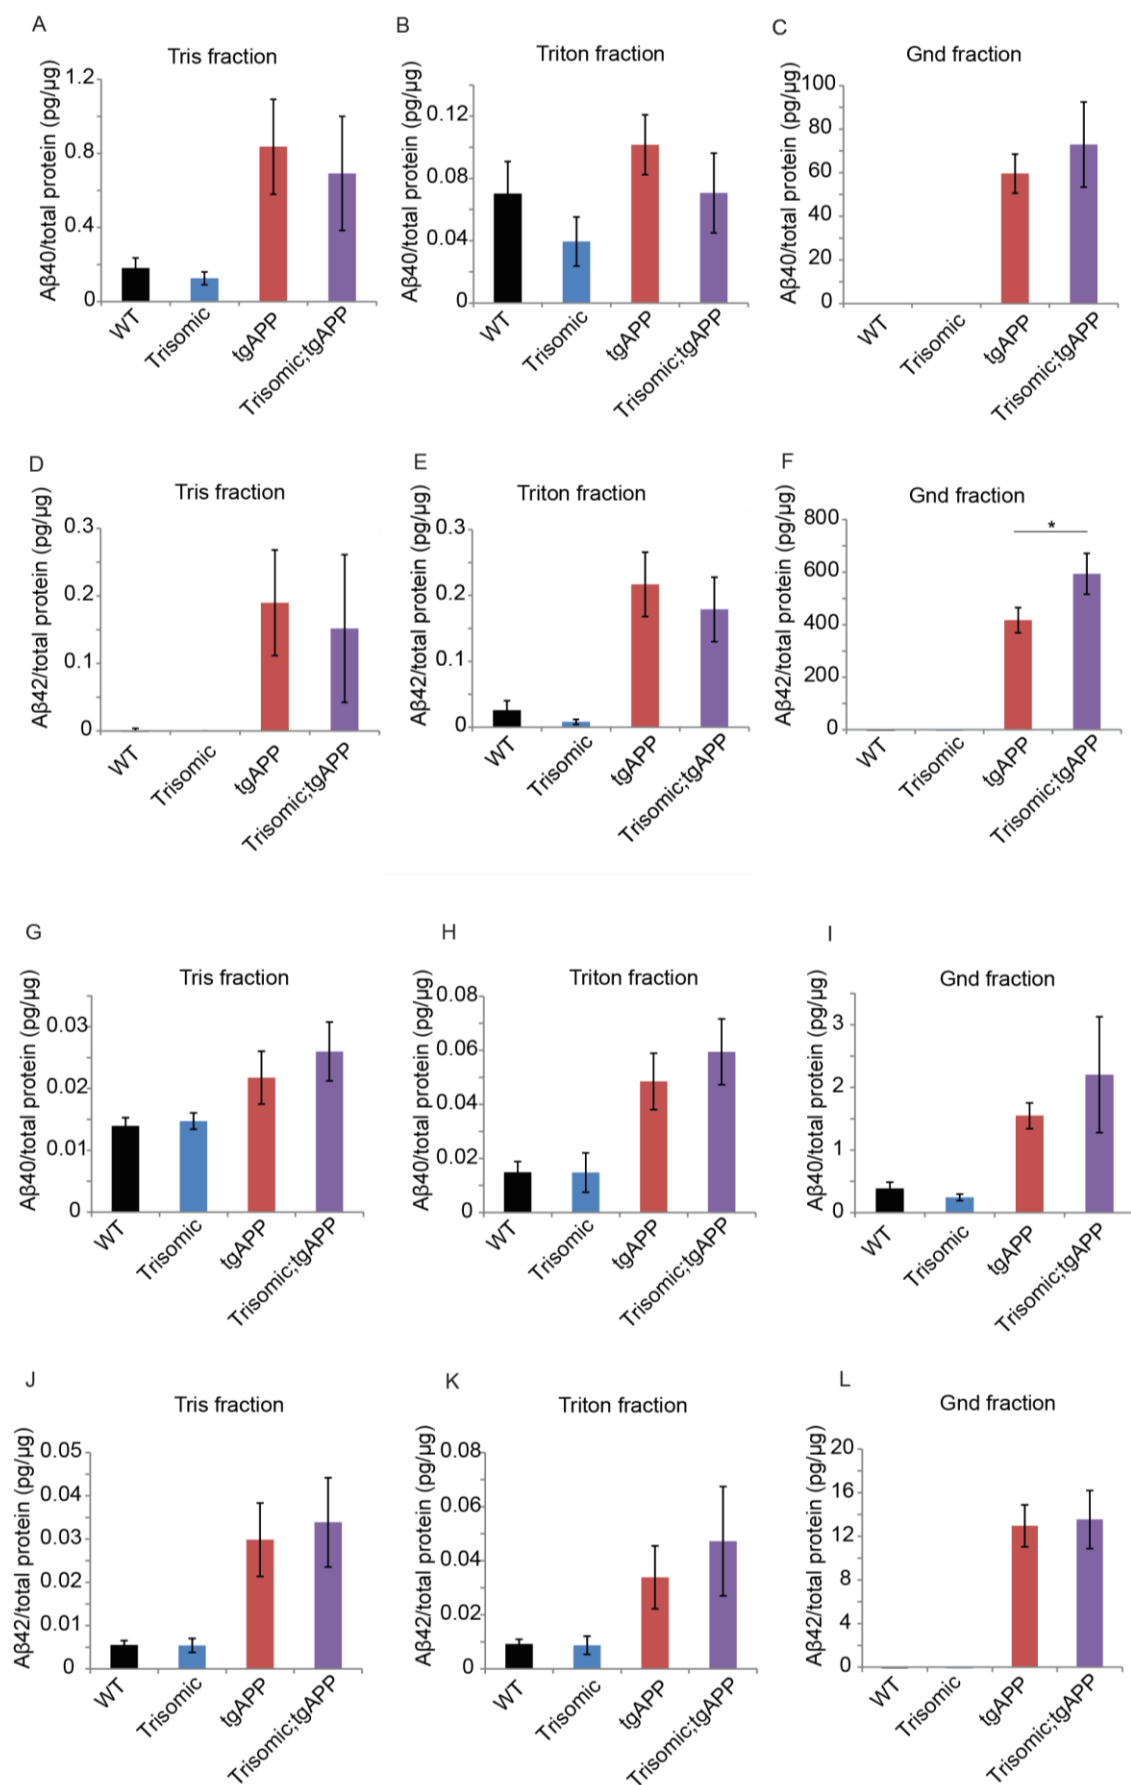

### **Supplementary Fig. 3: Human A $\beta$ 40 and A $\beta$ 42 in fractionated cortex**

Total cortical proteins, from (A-F) 16-months or (G-L) 6-months of age wildtype (WT), Trisomic, tgAPP and Trisomic;tgAPP mice, were fractionated into (A,D,G,J) tris soluble, (B,E,H,K) 1 % triton soluble, and (C,F,I,L) 5 M guanidine hydrochloride (Gnd) soluble fractions. The amount of human (A,B,C,G,H,I) A $\beta$ 40 and (D,E,F,J,K,L) A $\beta$ 42 was quantified by ELISA. (F) Trisomy of chromosome 21 significantly increased the amount of 5 M guanidine hydrochloride soluble A $\beta$ 42 (ANOVA interaction of tgAPP-trisomy-age  $F(1,40) = 5.037$   $p = 0.030$ ) at 16-months of age. No other statistically significant effects of genotype were observed. Data show mean  $\pm$  SEM,  $p < 0.05 = *$ . Both sexes were studied and sex was included as a variable in the ANOVA.

## Supplementary Figure 4

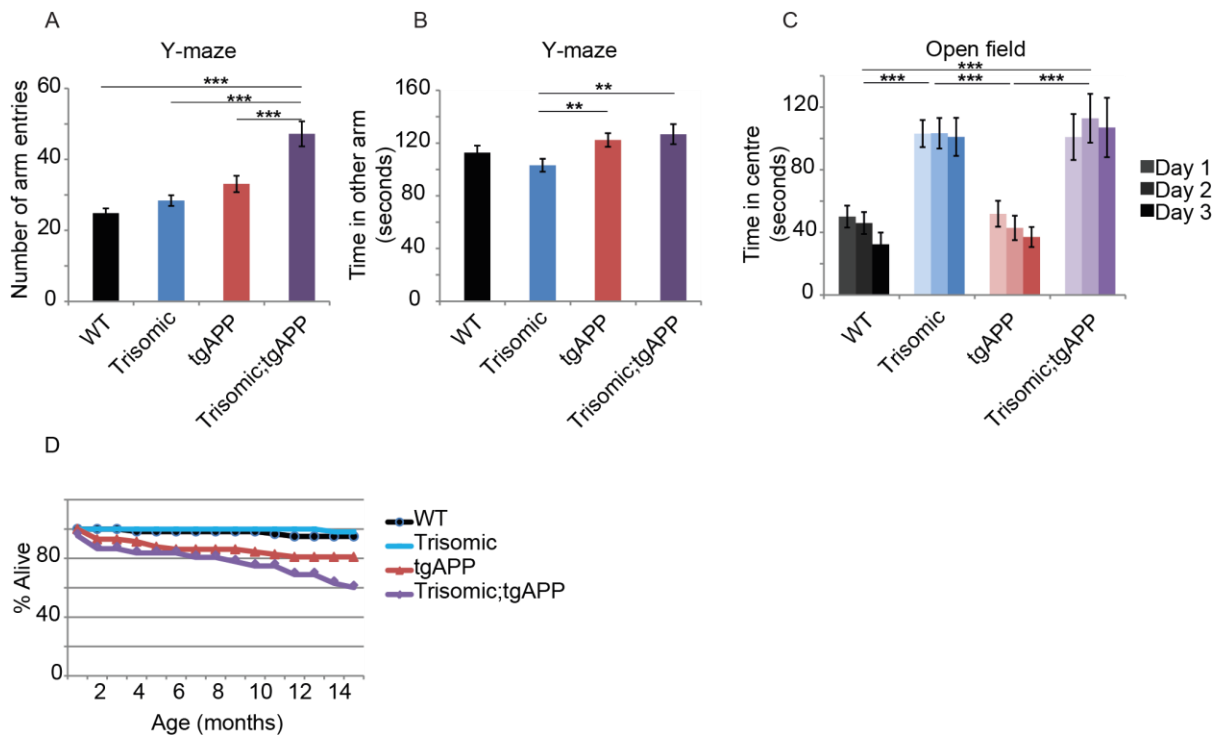

### Supplementary Fig. 4: Y-maze exposure phase, open field control data and survival time

(A) The number of arm entries made during this first exposure to the Y-maze was increased in the Trisomic-tgAPP mice, ANOVA revealed a main effect of trisomy ( $F(1,89) = 17.604, p < 0.001$ ), of tgAPP ( $F(1,89) = 28.519, p < 0.001$ ) and also an interaction of trisomy-tgAPP ( $F(1,89) = 4.705, p = 0.033$ ) (Bonferroni pairwise comparisons; Trisomic;tgAPP with WT  $p < 0.001$ , Trisomic  $p < 0.001$  and tgAPP  $p < 0.001$ , and tgAPP with WT  $p = 0.011$ ). Cohort B 2-3-months of age and Cohort A 6-7-months of age, the effect of genotype was similar in both cohorts so data was combined for analysis, WT  $n = 45$ , Trisomic  $n = 43$ , TgAPP  $n = 36$ , Trisomic;tgAPP  $n = 26$ . (B) The total time spent in the other arm (non-start arm) during the Y-maze exposure phase showed a main effect of tgAPP ( $F(1,89) = 9.570, p = 0.003$ ) and an interaction of tgAPP-trisomy ( $F(1,89) = 6.972, p = 0.010$ ). (Bonferroni pairwise comparisons Trisomic with tgAPP  $p = 0.008$  and Trisomic;tgAPP  $p = 0.002$ ). (C) Time spent in the centre of the open field was affected by Trisomy at 6-months of age (ANOVA main effect  $F(1,78) = 39.044, p < 0.001$ , Bonferroni pairwise comparisons Trisomic with WT  $p < 0.001$  and tgAPP  $p < 0.001$ , Trisomic;tgAPP with WT  $p < 0.001$  and tgAPP  $p < 0.001$ ). No interaction of Trisomy and tgAPP was found ( $F(1,78) = 0.074, p = 0.786$ ). Day of exposure to the open field did not significantly alter time in the centre ( $F(1,78) = 3.106, p = 0.082$ ) (D) Survival to 15 months of age was reduced in Trisomic;tgAPP compared with tgAPP mice (Chi-squared = 3.88,  $p = 0.048$ , Cohort A and C WT  $n = 60$ , Trisomic  $n = 53$ , TgAPP  $n = 58$ , Trisomic;tgAPP  $n = 34$ ). Data are represented as mean  $\pm$  SEM, \*  $p < 0.05$ , \*\*  $p < 0.01$ , \*\*\*  $p < 0.001$ . Both sexes were studied and sex was included as a variable in the ANOVA.

## Supplementary Figure 5

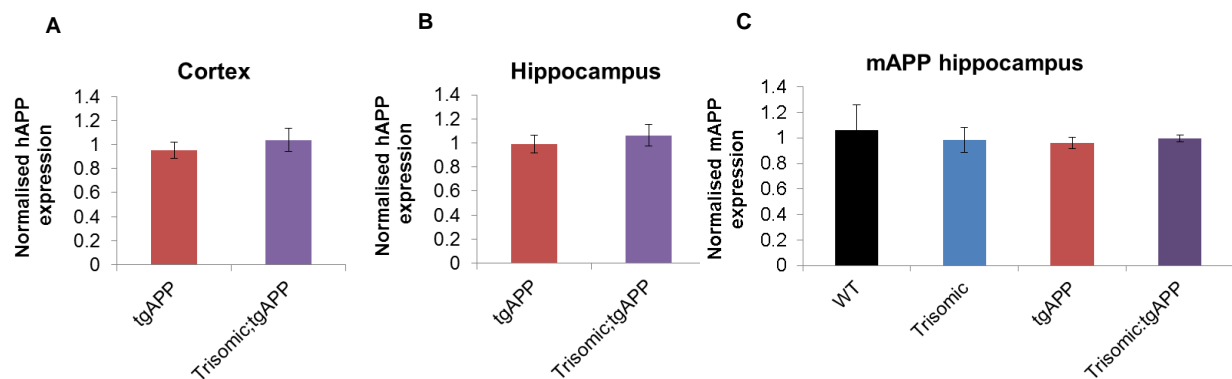

### Supplementary Fig. 5: Human and mouse APP mRNA levels in cortex and hippocampus

(A,B,C) The amount of human *APP* (carrying the Swedish mutation) and mouse *App* transcript was quantified in total RNA isolated from (A) whole cortex or (B, C) hippocampus by quantitative reverse-transcription PCR. The geometric mean of the amount of *APP/App* transcript detected relative to *ACTB* and *GAPDH* transcript level was calculated. (A, B) Trisomy of chromosome 21 did not significantly alter the amount of human mutant *APP* transcript (cortex T-test  $p = 0.503$ ,  $n = 6$ ; hippocampus T-test  $p = 0.360$ ,  $n = 6$ ); human mutant *APP* transcript was not detected in wildtype or Tc1 littermates that did not carry tgAPP. (C) Trisomy of chromosome 21 (ANOVA  $F(1,26) = 0.243$ ,  $p = 0.626$ ) or presence of tgAPP (ANOVA  $F(1,26) = 0.727$ ,  $p = 0.402$ , trisomy-tgAPP interaction  $F(1,26) = 0.781$ ,  $p = 0.676$ ) did not significantly alter the amount of mouse *App* transcript detected. Data show geometric mean  $\pm$  SEM. Both sexes were studied.

## Supplementary Figure 6

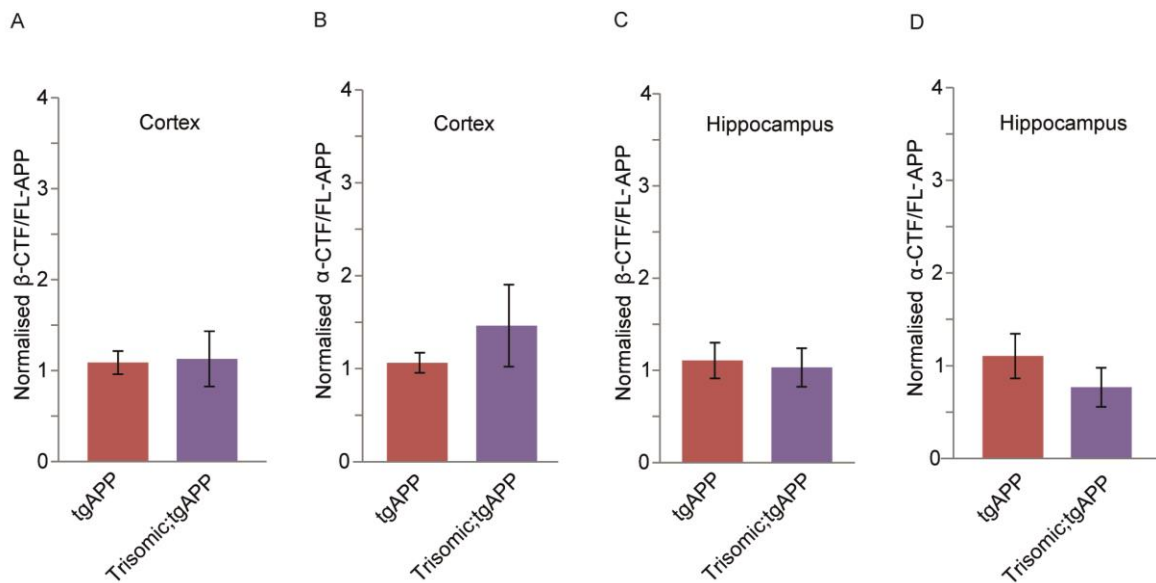

### Supplementary Fig. 6: $\beta$ -CTF/FL-APP and $\alpha$ -CTF/FL-APP in female cortex and hippocampus

(A-D) The ratio of  $\beta$ -CTF/FL-APP and  $\alpha$ -CTF/FL-APP in (A,B) cortex and (C,D) hippocampus from female mice was measured by western blot, using anti-APP-C-terminal antibody A8717. (A,C) No difference in the  $\beta$ -CTF/FL-APP ratio (T-test, cortex  $p = 0.903$ , tgAPP  $n = 7$ , Trisomic;tgAPP  $n = 9$ ; hippocampus  $p = 0.796$ , tgAPP  $n = 10$ , Trisomic;tgAPP  $n = 9$ ) or the (B,D)  $\alpha$ -CTF/FL-APP ratio (T-test, cortex  $p = 0.396$ , tgAPP  $n = 7$ , Trisomic;tgAPP  $n = 9$ , hippocampus  $p = 0.312$ , tgAPP  $n = 10$ , Trisomic;tgAPP  $n = 7$ ) was observed between tgAPP and Trisomic;tgAPP females. Data show mean  $\pm$  SEM.

## Supplementary Figure 7

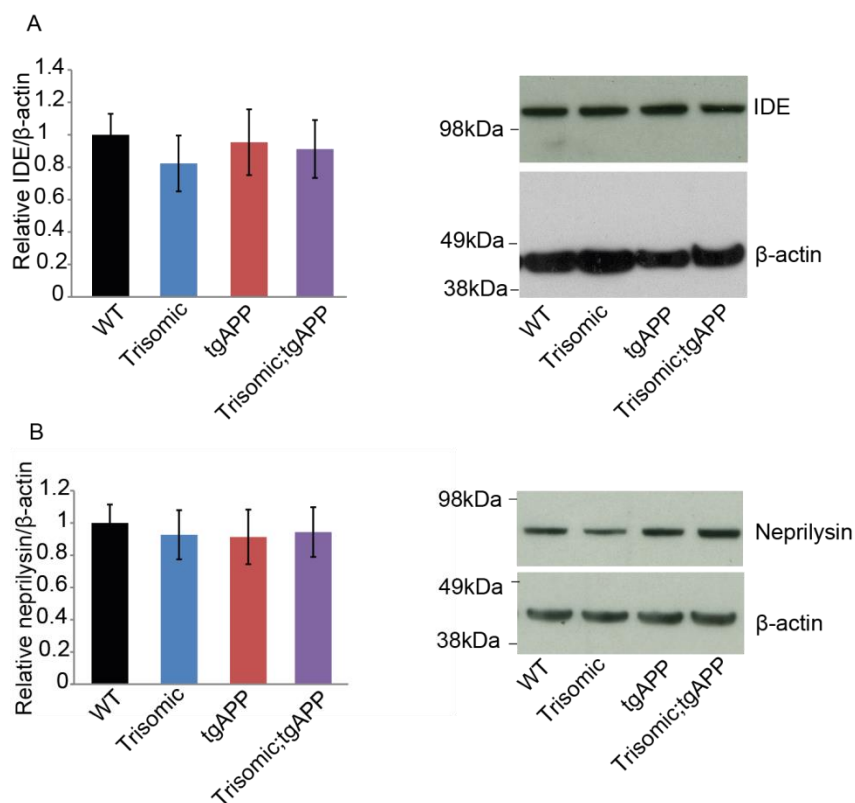

### Supplementary Fig. 7: The amount of insulin degrading enzyme and neprilysin in cortex

(A, B) The amount of (A) insulin degrading enzyme (IDE) and (B) neprilysin in total cortical proteins was measured by western blot, an anti- $\beta$ -actin antibody was used as a control for protein loading. Trisomy did not significantly alter the amount of the A $\beta$  clearance enzymes (ANOVA IDE trisomy  $F(1,14) = 0.108$ ,  $p = 0.748$ , trisomy-tgAPP interaction  $F(1,14) = 0.110$ ,  $p = 0.745$ , neprilysin trisomy  $F(1,23) = 0.041$ ,  $p = 0.841$ , trisomy-tgAPP interaction  $F(1,23) = 0.076$ ,  $p = 0.786$ ). Cropped western blots 4 lanes of a 8 lane gel. Data show mean  $\pm$  SEM. Both sexes were analysed.



## Supplementary table 1

Cases of human frontal cortex used for the study of  $\gamma$ -secretase activity

| Type                      | Sex | Age at death | Post mortem delay (hours) |
|---------------------------|-----|--------------|---------------------------|
| Healthy control           | m   | 54           | 9                         |
| Healthy control           | m   | 53           | 19                        |
| Healthy control           | f   | 59           | 19                        |
| Healthy control           | m   | 65           | 28                        |
| Healthy control           | m   | 55           | 41                        |
| Healthy control           | m   | 46           | 24                        |
| <b>Control group mean</b> |     | <b>55.3</b>  | <b>23.3</b>               |
| AD-DS                     | f   | 58           | not known                 |
| AD-DS                     | f   | 45           | 9                         |
| AD-DS                     | f   | 48           | 24                        |
| AD-DS                     | m   | 63           | 40                        |
| AD-DS                     | f   | 58           | 48                        |
| AD-DS                     | m   | 55           | 77                        |
| <b>AD-DS group mean</b>   |     | <b>54.5</b>  | <b>39.6</b>               |
